# Supplementary material for: The Arctic Ocean as a dead end for floating plastics in the North Atlantic branch of the Thermohaline Circulation
Source: PubMed Central journal article supplement — Sci Adv. 2017 Apr 19;3(4):e1600582. doi: 10.1126/sciadv.1600582 (PMC5397136; doi:10.1126/sciadv.1600582), 2017-04-19
Supplement: 1600582_SM.pdf [file 1600582_SM.pdf]

## Supplementary Materials for

### **The Arctic Ocean as a dead end for floating plastics in the North Atlantic branch of the Thermohaline Circulation**

Andrés Cózar, Elisa Martí, Carlos M. Duarte, Juan García-de-Lomas, Erik van Sebille, Thomas J. Ballatore, Victor M. Eguíluz, J. Ignacio González-Gordillo, Maria L. Pedrotti, Fidel Echevarría, Romain Troublè, Xabier Irigoien

Published 19 April 2017, *Sci. Adv.* **3**, e1600582 (2017)

DOI: 10.1126/sciadv.1600582

#### **This PDF file includes:**

- Supplementary Text
- fig. S1. Seasonal cycle of ocean surface salinities for 2013 provided by the Aquarius Mission (NASA and Space Agency of Argentina; <http://aquarius.umaine.edu>).
- fig. S2. Relationship between salinity (depths, 5 and 20 m) and surface plastic debris measured in the present study.
- fig. S3. Pie charts in number of items (upper) and surface area (lower) of the plastic types found in the Mediterranean Sea (left), SOGs (center), and Arctic Ocean (right).
- fig. S4. Images of different categories of microplastics found in the Arctic Ocean.
- fig. S5. Relationship between the estimates of total surface plastic load [(2, 7); this work], coastal population, and presence of vessels per great basins: Arctic, Mediterranean (Med), North Atlantic (N Atl), South Atlantic (S Atl), North Pacific (N Pac), South Pacific (S Pac), and Indian Ocean.
- table S1. Size distribution of floating plastic debris collected for the present study.
- table S2. Number of items per tow (fibers, nonfibers, and total items) and concentrations in abundance and weight per square kilometer (excluding fibers).
- References (28, 29)

## Supplementary Text

### Fiber-type plastic in the Arctic Ocean

There is high risk of sample contamination with plastic fibers from clothing, even if the sample analyses are conducted under clean air conditions, because the vessel could act as a source of fibers during sampling. All plastic type categories peaked in the Greenland and Barents Seas, with the exception of fibers that were more uniformly distributed (Fig. 1E). The widespread occurrence of fibers suggested that either the samples could have been contaminated with fibers during sampling, or that a particular environmental factor such as wind leads to a greater dispersal of fibers. Atmospheric transport of thin plastic fibers into the Arctic could explain their common presence in the permafrost found by other authors (9). However, as we could not eliminate the possibility of contamination during the whole process of sample collection and analysis, we opted to provide conservative estimates of the Arctic plastic load and discarded fibers from both weight and numerical estimates, as done in other studies (2, 7). Fibers represented 26% in abundance and only 3% in mass of the total plastic collected.

### Relationship between surface plastic loads and pollution sources at global scale

Considering seven basins (North and South Atlantic, North and South Pacific, Indian, Mediterranean, and Arctic), we found statistically significant correlations between total surface plastic loads per basin and both coastal population ( $R = 0.78$ ,  $p = 0.039$ ,  $n = 7$ ) and presence of vessels ( $R = 0.82$ ,  $p = 0.025$ ,  $n = 7$ ) (fig. S5), indicating high consistency in the data set at the global scale. However, coastal population and maritime traffic per basins were significantly correlated at global scale ( $R = 0.99$ ,  $p < 0.0001$ ,  $n = 7$ ), which makes it difficult to determine the relative contribution of these pollution sources to the total plastic load. Some reports suggest that 20% of marine debris originates from marine activities and 80% from land, but this partition is not supported by rigorous data (28). Yet, the relationship between coastal population and maritime traffic for the Arctic (and particularly the Greenland and Barents Seas) clearly diverged from that in other world basins, showing the highest ratio of shipping relative to population density (Table 1).

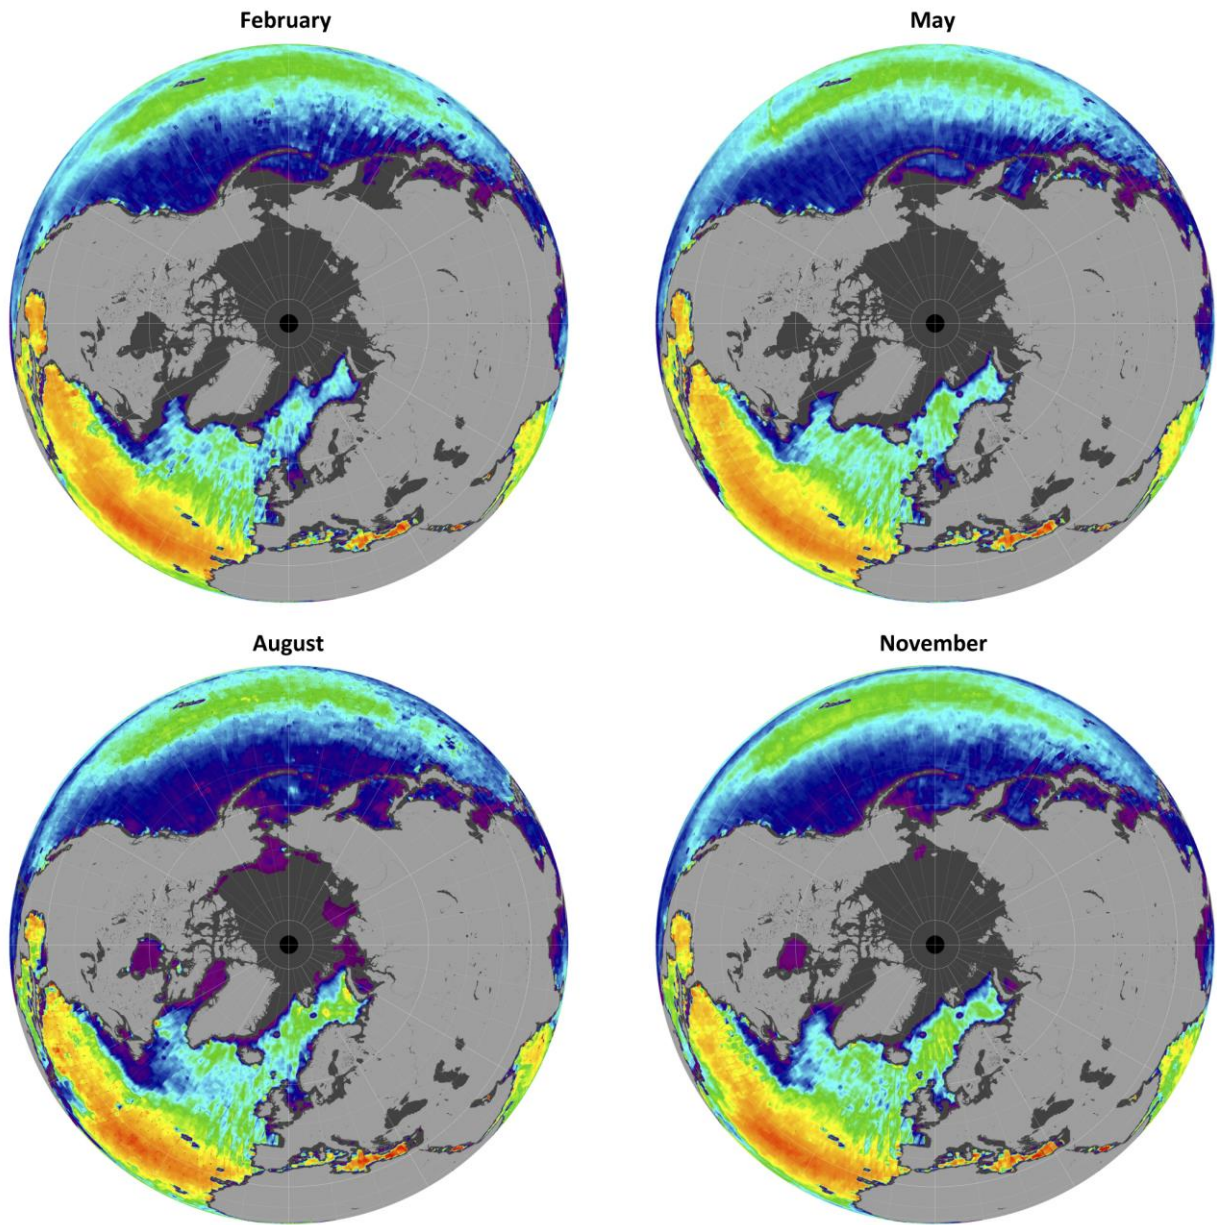

**fig. S1. Seasonal cycle of ocean surface salinities for 2013 provided by the Aquarius Mission** (NASA and Space Agency of Argentina; <http://aquarius.umaine.edu>). Color scale is shown in Fig. 1C.

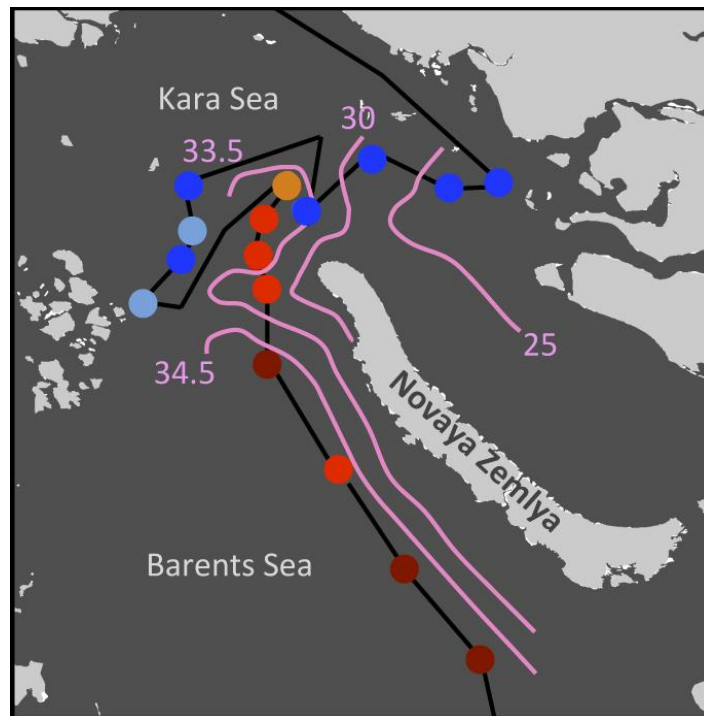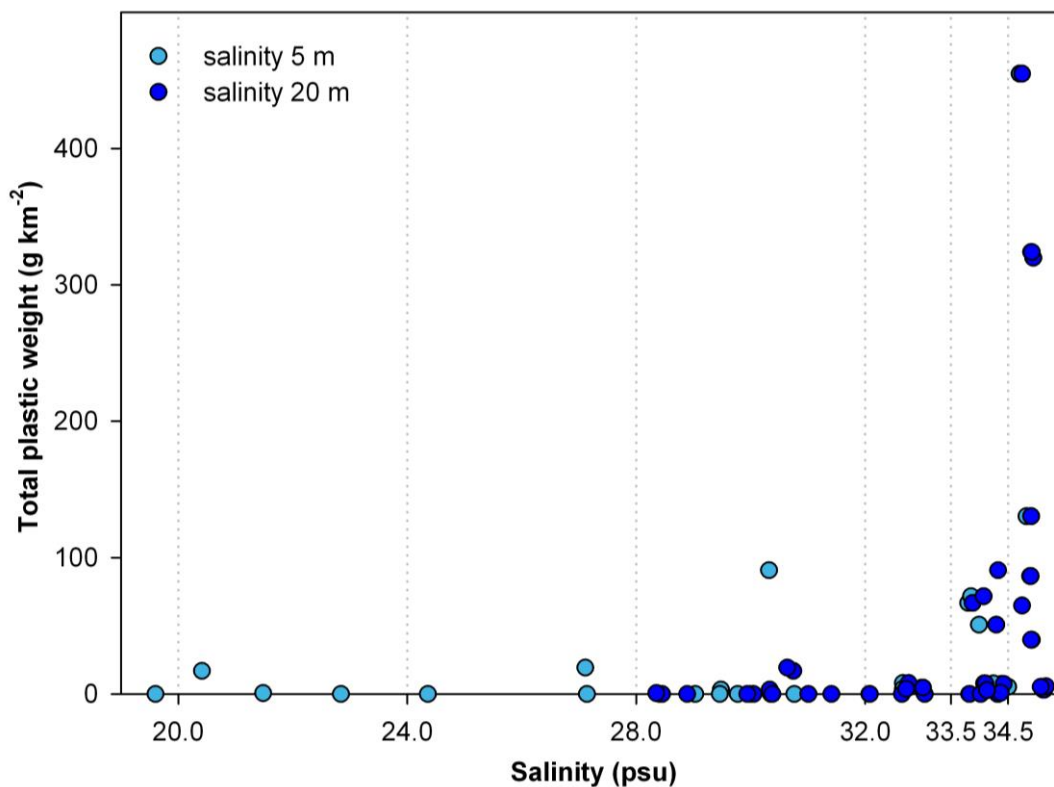

**fig. S2. Relationship between salinity (depths, 5 and 20 m) and surface plastic debris measured in the present study.** Note that the outlayer at 30.3 psu and 5 m depth showed 33.3 psu at 20 m depth, indicating that freshwater surface layer at this site was relatively thin. The upper map shows contour lines, interpolated by triangulation, describing salinity (5 m depth) in the zone of the front between waters of differing salinities and plastic concentrations.

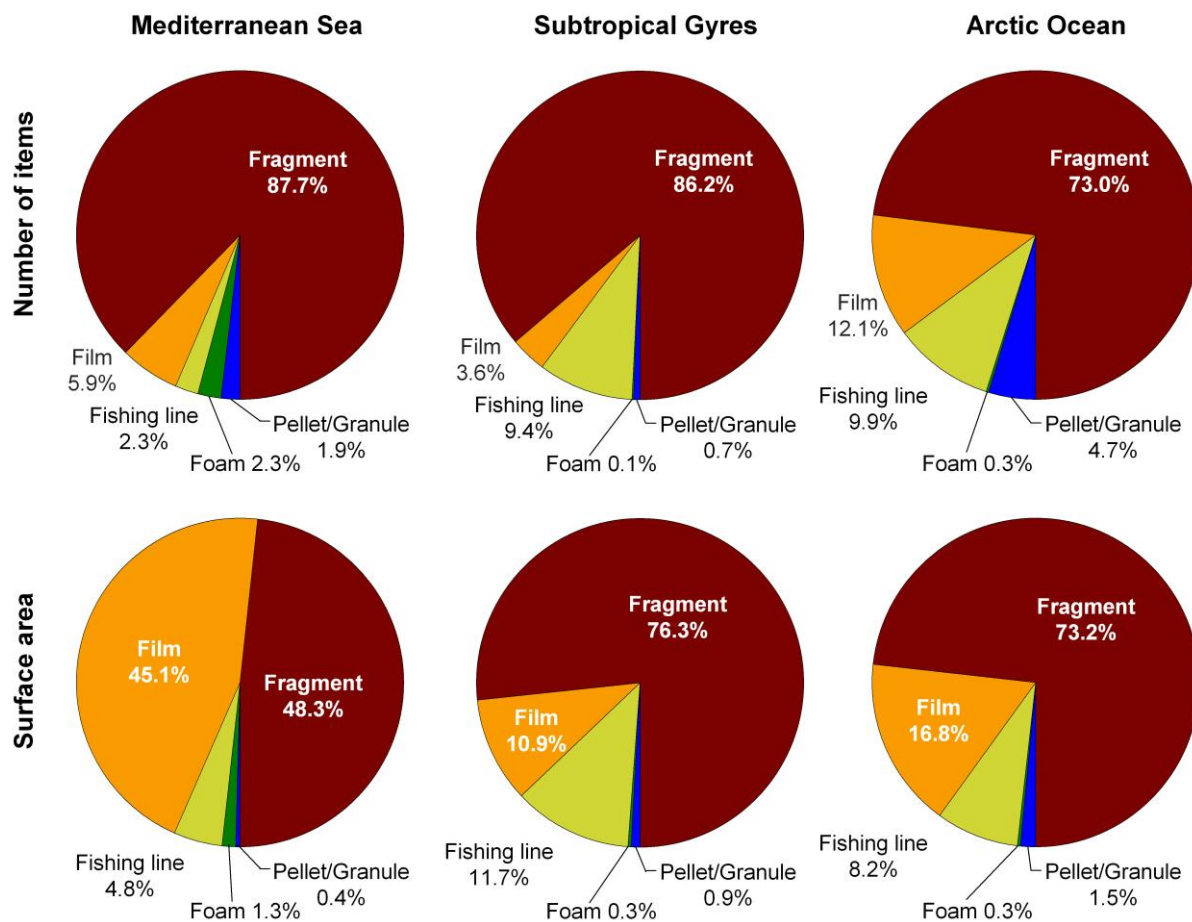

**fig. S3. Pie charts in number of items (upper) and surface area (lower) of the plastic types found in the Mediterranean Sea (left), SOGs (center), and Arctic Ocean (right).** Images of the different categories are shown in fig. S4. Sample collections for SOGs (4173 items) and Mediterranean (3854 items) are described in previous reports (2, 7). The pieces of plastic film were particularly small in the Arctic, and large in the Mediterranean, the region with the shortest pathway to potentially important sources of debris.



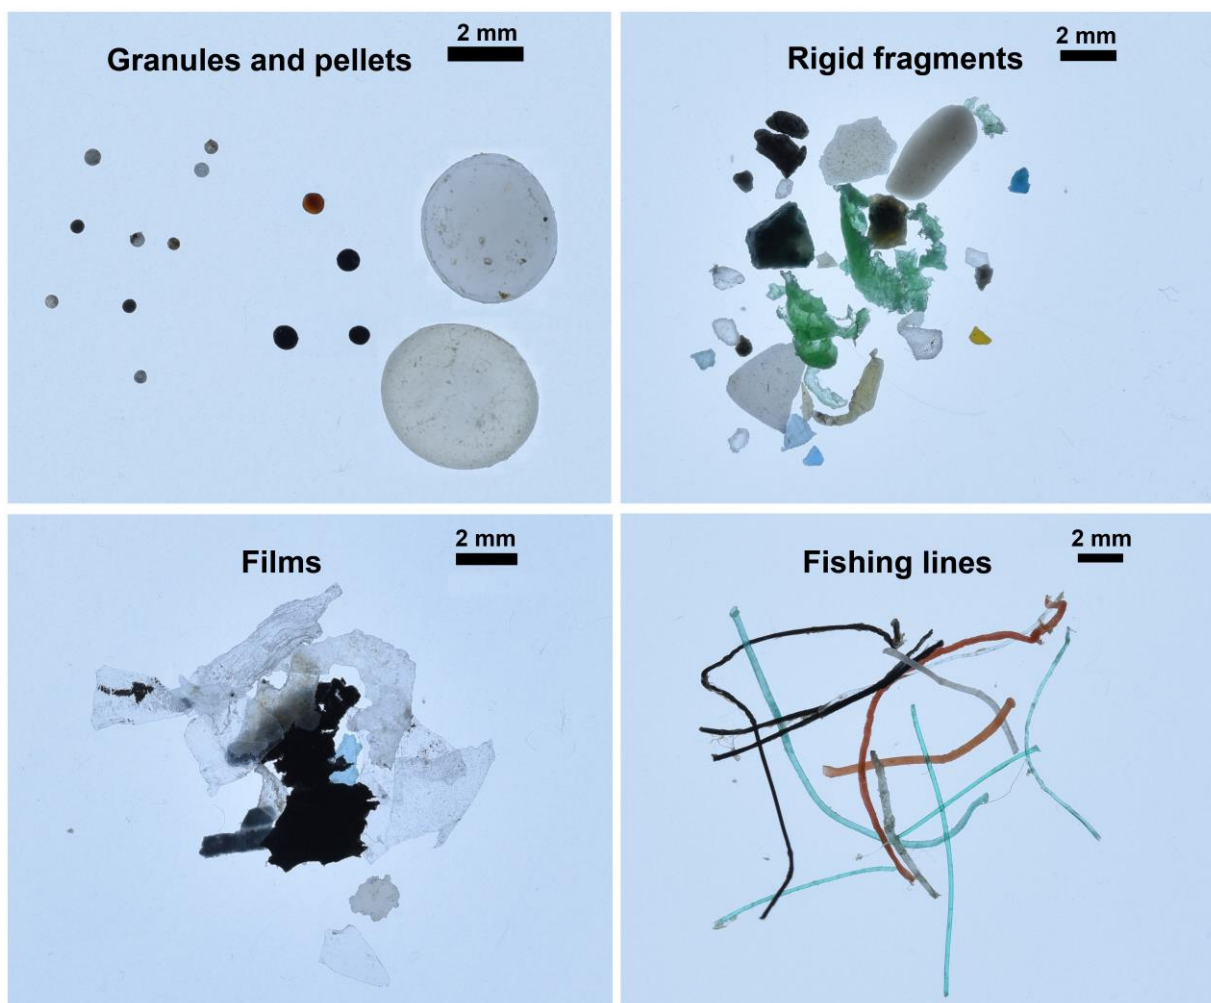

**fig. S4. Images of different categories of microplastics found in the Arctic Ocean.** Granules were grouped together with industrial raw pellets, although the former are generally quite smaller than pellets.

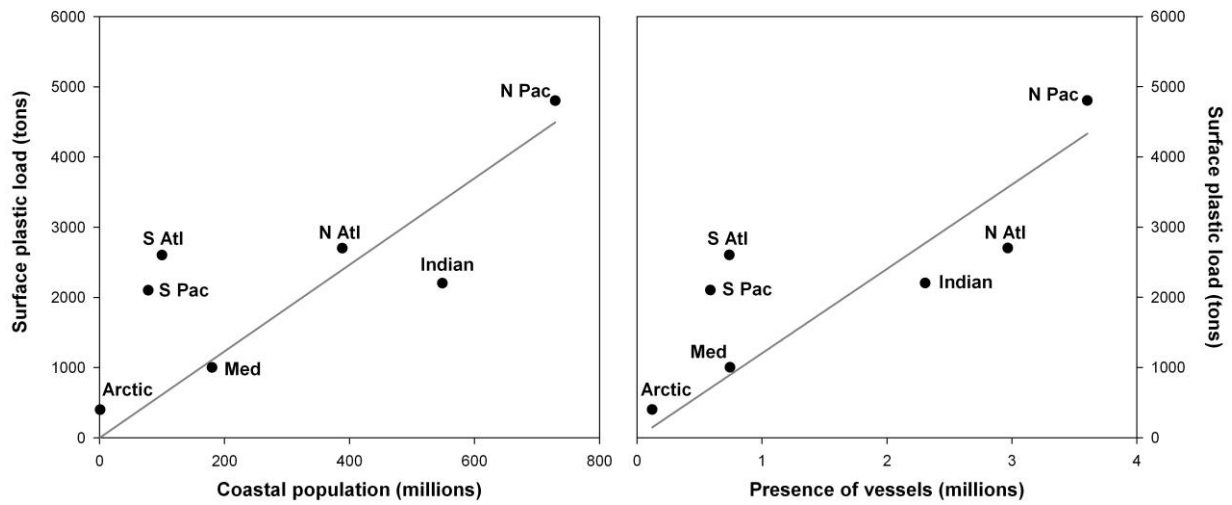

**fig. S5. Relationship between the estimates of total surface plastic load [(2, 7); this work], coastal population, and presence of vessels per great basins: Arctic, Mediterranean (Med), North Atlantic (N Atl), South Atlantic (S Atl), North Pacific (N Pac), South Pacific (S Pac), and Indian Ocean.** Straight lines represent the ordinary least squares regression fitted to total surface plastic loads per basin as a function of coastal population ( $R = 0.78$ ,  $p = 0.039$ ,  $n = 7$ ) and presence of vessels ( $R = 0.82$ ,  $p = 0.025$ ,  $n = 7$ ). The Southern Ocean was not included in the analysis due to the lack of data, although available studies suggest scarce plastic pollution for that basin (29).

**table S1. Size distribution of floating plastic debris collected for the present study.** Number of items in each bin (excluding fibers).

| <b>Lower size</b> | <b>Upper size</b> | <b>Plastic items</b> |
|-------------------|-------------------|----------------------|
| 0.32              | 0.40              | 5                    |
| 0.40              | 0.50              | 10                   |
| 0.50              | 0.63              | 29                   |
| 0.63              | 0.79              | 41                   |
| 0.79              | 1.00              | 67                   |
| 1.00              | 1.26              | 97                   |
| 1.26              | 1.58              | 85                   |
| 1.58              | 2.00              | 98                   |
| 2.00              | 2.51              | 76                   |
| 2.51              | 3.16              | 89                   |
| 3.16              | 3.98              | 51                   |
| 3.98              | 5.01              | 48                   |
| 5.01              | 6.31              | 28                   |
| 6.31              | 7.94              | 18                   |
| 7.94              | 10.0              | 19                   |
| 10.0              | 12.6              | 18                   |
| 12.6              | 15.9              | 9                    |
| 15.9              | 20.0              | 4                    |
| 20.0              | 25.1              | 1                    |
| 25.1              | 31.6              | 1                    |
| 31.6              | 860               | 2                    |



**table S2. Number of items per tow (fibers, nonfibers, and total items) and concentrations in abundance and weight per square kilometer (excluding fibers).**

| Vessel | Latitude (°) | Longitude (°) | Date     | # fibers | # non-fibers | # total items | # km <sup>-2</sup> | g km <sup>-2</sup> |
|--------|--------------|---------------|----------|----------|--------------|---------------|--------------------|--------------------|
| Tara   | 67.206       | 00.257        | 04/06/13 | 4        | 3            | 7             | 4917               | 3.0                |
| Tara   | 68.994       | 02.165        | 05/06/13 | 6        | 10           | 16            | 6878               | 5.4                |
| Tara   | 70.369       | 03.731        | 06/06/13 | 9        | 4            | 13            | 2884               | 5.1                |
| Tara   | 74.168       | 03.910        | 08/06/13 | 7        | 316          | 323           | 133815             | 39.6               |
| Tara   | 76.072       | 02.087        | 09/06/13 | 9        | 14           | 23            | 112614             | 130.2              |
| Tara   | 71.049       | 38.691        | 30/06/13 | 0        | 9            | 9             | 63093              | 64.7               |
| Tara   | 72.604       | 44.136        | 02/07/13 | 0        | 41           | 41            | 236952             | 319.7              |
| Tara   | 74.389       | 47.137        | 03/07/13 | 0        | 101          | 101           | 239525             | 323.9              |
| Tara   | 75.952       | 51.927        | 04/07/13 | 5        | 27           | 32            | 30505              | 86.3               |
| Tara   | 77.582       | 58.474        | 05/07/13 | 16       | 94           | 110           | 317091             | 454.6              |
| Tara   | 77.756       | 65.405        | 13/07/13 | 3        | 102          | 105           | 76152              | 90.7               |
| Tara   | 77.982       | 67.800        | 06/07/13 | 13       | 16           | 29            | 64756              | 66.7               |
| Tara   | 77.912       | 71.746        | 14/07/13 | 1        | 12           | 13            | 68568              | 71.5               |
| Tara   | 77.439       | 75.731        | 05/08/13 | 6        | 9            | 15            | 26568              | 50.8               |
| Tara   | 79.673       | 60.990        | 11/08/13 | 15       | 2            | 17            | 10241              | 7.2                |
| Tara   | 79.203       | 66.575        | 10/07/13 | 25       | 4            | 29            | 3762               | 0.8                |
| Tara   | 79.015       | 69.710        | 06/08/13 | 3        | 2            | 5             | 1777               | 7.6                |
| Tara   | 77.256       | 73.256        | 15/07/13 | 9        | 0            | 9             | 0                  | 0.0                |
| Tara   | 79.082       | 74.263        | 12/08/13 | 11       | 0            | 11            | 0                  | 0.0                |
| Tara   | 75.973       | 78.509        | 04/08/13 | 1        | 0            | 1             | 0                  | 0.0                |
| Tara   | 74.811       | 76.166        | 18/07/13 | 11       | 0            | 11            | 0                  | 0.0                |
| Tara   | 73.964       | 77.072        | 19/07/13 | 5        | 0            | 5             | 0                  | 0.0                |
| Tara   | 77.925       | 116.912       | 27/08/13 | 4        | 0            | 4             | 0                  | 0.0                |
| Tara   | 73.824       | 145.776       | 02/09/13 | 0        | 1            | 1             | 20665              | 16.8               |
| Tara   | 71.511       | 160.987       | 03/09/13 | 7        | 0            | 7             | 0                  | 0.0                |
| Tara   | 70.714       | 166.290       | 04/09/13 | 6        | 0            | 6             | 0                  | 0.0                |
| Tara   | 71.159       | 174.810       | 08/09/13 | 3        | 0            | 3             | 0                  | 0.0                |
| Tara   | 72.207       | -158.277      | 13/09/13 | 10       | 1            | 11            | 23144              | 19.3               |
| Tara   | 71.875       | -153.075      | 15/09/13 | 2        | 0            | 2             | 0                  | 0.0                |
| Tara   | 71.332       | -147.298      | 16/09/13 | 0        | 0            | 0             | 0                  | 0.0                |
| Tara   | 71.478       | -140.102      | 16/09/13 | 16       | 1            | 17            | 762                | 0.5                |
| Tara   | 71.981       | -92.449       | 27/09/13 | 11       | 1            | 12            | 3059               | 3.2                |
| Tara   | 73.148       | -83.033       | 03/10/13 | 3        | 0            | 3             | 0                  | 0.0                |
| Tara   | 73.067       | -79.639       | 05/10/13 | 13       | 0            | 13            | 0                  | 0.0                |

|               |        |         |          |    |   |    |       |      |
|---------------|--------|---------|----------|----|---|----|-------|------|
| Tara          | 72.675 | -77.544 | 06/10/13 | 14 | 0 | 14 | 0     | 0.0  |
| Tara          | 70.946 | -52.478 | 12/10/13 | 9  | 0 | 9  | 0     | 0.0  |
| Tara          | 69.203 | -51.147 | 15/10/13 | 12 | 5 | 17 | 11136 | 8.0  |
| Tara          | 69.113 | -50.364 | 20/10/13 | 3  | 2 | 5  | 7041  | 4.6  |
| Tara          | 64.688 | -52.034 | 23/10/13 | 6  | 1 | 7  | 5794  | 3.6  |
| Tara          | 61.522 | -54.011 | 27/10/13 | 2  | 7 | 9  | 3966  | 2.6  |
| Pakea Bizkaia | 60.46  | -49.54  | 12/06/11 |    | 1 | 1  | 1542  | 5.09 |
| Pakea Bizkaia | 63.57  | -53.12  | 15/06/11 |    | 8 | 8  | 14251 | 7.76 |
